# Supplementary material for: The cost of care for children hospitalized with respiratory syncytial virus (RSV) associated lower respiratory infection in Kenya
Source: PubMed Central journal article supplement — BMC Public Health. 2024 Sep 4;24:2410. doi: 10.1186/s12889-024-19875-y (PMC11375914; doi:10.1186/s12889-024-19875-y), 2024-09-04
Supplement: 12889_2024_19875_MOESM1_ESM.pdf [file 12889_2024_19875_MOESM1_ESM.pdf]

**The cost of care for children hospitalized with respiratory syncytial virus (RSV) associated lower respiratory infection in Kenya**

**Joyce U. Nyiro**<sup>1\*</sup>, Bryan O. Nyawanda<sup>2</sup>, Martin Mutunga<sup>1</sup>, Nickson Murunga<sup>1</sup>, D. James Nokes<sup>1,3</sup>, Godfrey Bigogo<sup>2</sup>, Nancy A. Otieno<sup>2</sup>, Shirley Lidechi<sup>2</sup>, Bilali Mazoya<sup>4</sup>, Mark Jit<sup>5</sup>, Cheryl Cohen<sup>6</sup>, Jocelyn Moyes<sup>6</sup>, Clint Pecenka<sup>7</sup>, Ranju Baral<sup>7</sup>, Clayton Onyango<sup>8</sup>, Patrick K. Munywoki<sup>8</sup> and Elisabeth Vodicka<sup>7</sup>

\* **Corresponding author Address:** Telephone: +254 417 522063, P.O Box 230-80108 Kilifi, Kenya. Email: [jnyiro@kemri-wellcome.org](mailto:jnyiro@kemri-wellcome.org)

Full list of author information is available at the end of the article.

## Additional File 1: Patients Characteristics stratified by age from Kilifi and Siaya County

### Hospitals

| PARTICIPANTS                                                                    | KILIFI     |              | SIAYA      |              | KILIFI AND SIAYA COMBINED |              | Ch2 P value  |
|---------------------------------------------------------------------------------|------------|--------------|------------|--------------|---------------------------|--------------|--------------|
|                                                                                 | n          | (%)          | n          | (%)          | N                         | (%)          |              |
| <b>Characteristic</b>                                                           | <b>241</b> | <b>100</b>   | <b>184</b> | <b>100</b>   | <b>425</b>                | <b>100</b>   |              |
| <b>Age in months</b>                                                            |            |              |            |              |                           |              |              |
| < 6 months                                                                      | 97         | 40.25        | 31         | 16.86        | 128                       | 30.12        |              |
| 6-11 months                                                                     | 69         | 28.63        | 45         | 24.46        | 114                       | 26.82        | <b>0.001</b> |
| 12-23 months                                                                    | 51         | 21.16        | 35         | 19.02        | 86                        | 20.24        |              |
| 24-59 months                                                                    | 24         | 9.96         | 73         | 39.67        | 97                        | 22.82        |              |
| <b>With RSV infection by age</b>                                                |            |              |            |              |                           |              |              |
| < 6 months                                                                      | <b>79</b>  | <b>32.78</b> | <b>21</b>  | <b>11.41</b> | <b>100</b>                | <b>23.53</b> |              |
| < 6 months                                                                      | 43         | 44.33        | 5          | 16.13        | 48                        | 37.5         | <b>0.005</b> |
| 6-11 months                                                                     | 25         | 36.23        | 7          | 15.56        | 32                        | 28.07        | <b>0.016</b> |
| 12-23 months                                                                    | 10         | 19.61        | 2          | 5.71         | 12                        | 13.95        | 0.068        |
| 24-59 months                                                                    | 1          | 4.17         | 7          | 9.59         | 8                         | 8.25         | 0.402        |
| <b>Mortality during Hospitalization</b>                                         |            |              |            |              |                           |              |              |
| < 6 months                                                                      | <b>19</b>  | <b>7.88</b>  | <b>11</b>  | <b>5.99</b>  | <b>30</b>                 | <b>7.06</b>  | 0.171        |
| < 6 months                                                                      | 9          | 9.28         | 1          | 3.23         | 10                        | 7.81         | 0.320        |
| 6-11 months                                                                     | 7          | 10.14        | 3          | 6.67         | 10                        | 8.77         | 0.577        |
| 12-23 months                                                                    | 1          | 1.96         | 4          | 11.43        | 5                         | 5.81         | 0.065        |
| 24-59 months                                                                    | 2          | 8.33         | 3          | 4.11         | 5                         | 5.15         | 0.616        |
| <b>Mortality 2 weeks post discharge</b>                                         |            |              |            |              |                           |              |              |
| < 6 months                                                                      | <b>7</b>   | <b>2.75</b>  | <b>10</b>  | <b>5.81</b>  | <b>17</b>                 | <b>4.1</b>   | 0.13         |
| < 6 months                                                                      | 3          | 3.49         | 1          | 3.33         | 4                         | 3.45         | 0.97         |
| 6-11 months                                                                     | 3          | 4.92         | 3          | 7.14         | 6                         | 5.83         | 0.64         |
| 12-23 months                                                                    | 1          | 2.00         | 4          | 12.90        | 5                         | 6.17         | 0.05         |
| 24-59 months                                                                    | 0          | 0.00         | 2          | 2.90         | 2                         | 2.2          | 0.42         |
| <b>Overall Mortality from hospitalization to 2 weeks post discharge</b>         |            |              |            |              |                           |              |              |
| < 6 months                                                                      | <b>26</b>  | <b>10.79</b> | <b>21</b>  | <b>11.41</b> | <b>47</b>                 | <b>11.06</b> | 0.839        |
| < 6 months                                                                      | 12         | 12.37        | 2          | 6.45         | 14                        | 10.94        | 0.358        |
| 6-11 months                                                                     | 10         | 14.49        | 6          | 13.33        | 16                        | 14.04        | 0.862        |
| 12-23 months                                                                    | 2          | 3.92         | 8          | 22.86        | 10                        | 11.63        | 0.007        |
| 24-59 months                                                                    | 2          | 8.33         | 5          | 6.85         | 7                         | 7.22         | 0.807        |
| <b>Primary diagnosis for &lt;6months patients with disease outcome as death</b> |            |              |            |              |                           |              |              |
| < 6 months                                                                      | <b>12</b>  | <b>12.37</b> | <b>2</b>   | <b>6.45</b>  | <b>14</b>                 | <b>10.94</b> |              |
| LRTI Only                                                                       | 2          | 2.06         | 0          |              | 2                         | 1.56         |              |
| Birth asphyxia                                                                  | 1          | 1.03         | 0          |              | 1                         | 0.78         |              |
| Bronchiolitis                                                                   | 1          | 1.03         | 2          | 6.45         | 3                         | 2.34         |              |
| Congenital abnormalities                                                        | 2          | 2.06         | 0          |              | 2                         | 1.56         |              |
| heart disease-congenital                                                        | 1          | 1.03         | 0          |              | 1                         | 0.78         |              |
| meningitis-not TBM                                                              | 1          | 1.03         | 0          |              | 1                         | 0.78         |              |
| neonatal sepsis                                                                 | 1          | 1.03         | 0          |              | 1                         | 0.78         |              |
| preterm                                                                         | 2          | 2.06         | 0          |              | 2                         | 1.56         |              |
| septicaemia/sepsis                                                              | 1          | 1.03         | 0          |              | 1                         | 0.78         |              |
